# Supplementary material for: Interface phonon modes in the [AlN/GaN]20 and [Al0.35Ga0.65N/Al0.55Ga0.45N]20 2D multi-quantum well structures
Source: Royal Society of Chemistry journal article supplement (doi:10.1039/c6cp05520f), 2016-01-01
Supplement: c6cp05520f1.pdf [file c6cp05520f1.pdf]

Electronic Supplementary Information (ESI);

**Interface Phonon Modes in the  $[\text{AlN}/\text{GaN}]_{20}$  and  $[\text{Al}_{0.35}\text{Ga}_{0.65}\text{N}/\text{Al}_{0.55}\text{Ga}_{0.45}\text{N}]_{20}$**

**2D Multi Quantum Well Structures**

A. K. Sivadasan,<sup>\*,1</sup> Chirantan Singha,<sup>2</sup> A. Bhattacharyya,<sup>3</sup> and Sandip Dhara<sup>\*,1</sup>

<sup>1</sup> Nanomaterials and Sensors Section, Surface and Nanoscience Division, Indira Gandhi Centre for Atomic Research, Homi Bhabha National Institute, Kalpakkam-603102, India

<sup>2</sup> Centre for Research in Nanoscience and Nanotechnology, University of Calcutta, JD2, Sector-III, Saltlake City, Kolkata-700106, West Bengal, India

<sup>3</sup> Institute of Radio Physics and Electronics, University of Calcutta, 92, A.P.C. Road, Kolkata-700009, West Bengal, India

E-mail: [sivankondazhy@gmail.com](mailto:sivankondazhy@gmail.com) ; [dhara@igcar.gov.in](mailto:dhara@igcar.gov.in)

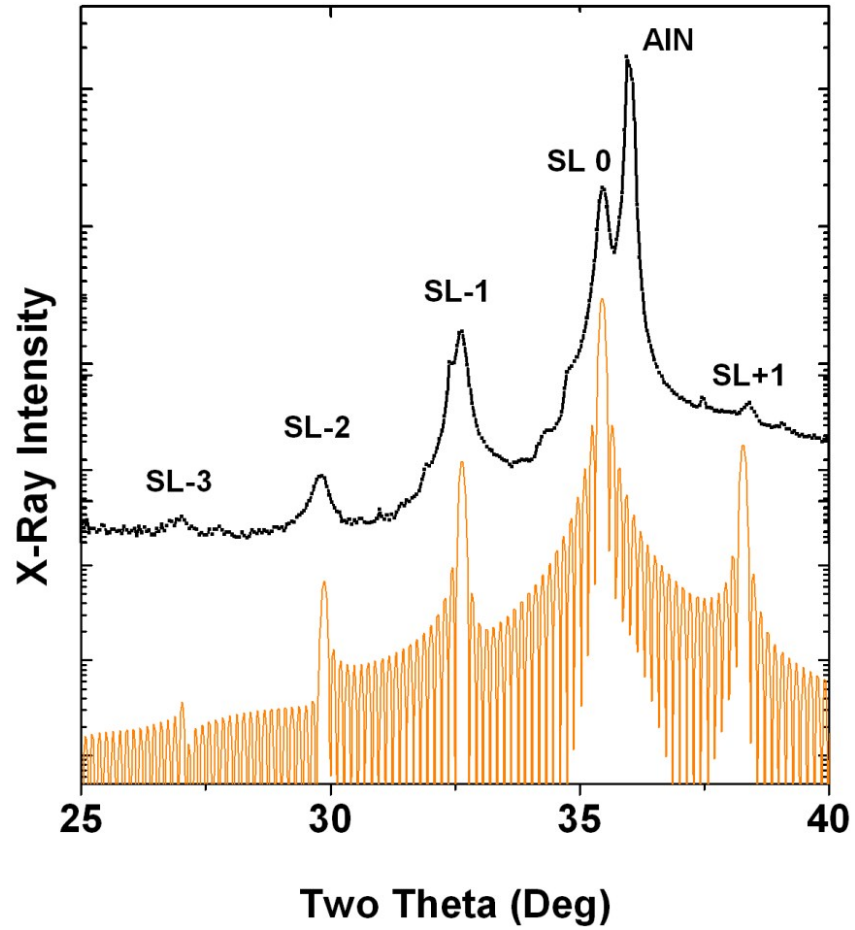

**Fig. S1.** High resolution x-ray diffraction data of  $[\text{AlN}/\text{GaN}]_{20}$  MQWs showing the AlN layer and several superlattice peaks. Simulation using the X-ray Kinematic model [1] shows that the periodicity of the repeating bi-layer of QW structures is about 3.25 nm.

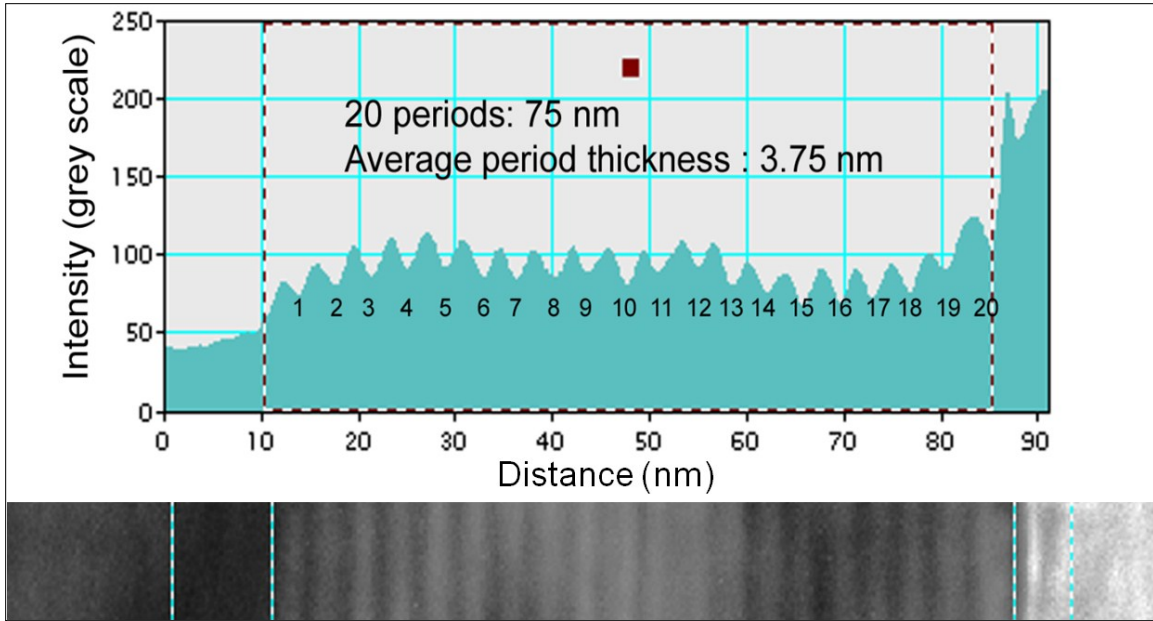

**Fig. S2.** Transmission electron microscopic image and corresponding intensity plot of  $[\text{Al}_{0.35}\text{Ga}_{0.65}\text{N}/\text{Al}_{0.55}\text{Ga}_{0.45}\text{N}]_{20}$  MQW showing 20 periods of repeating bi-layer of QWs with 3.75 nm.

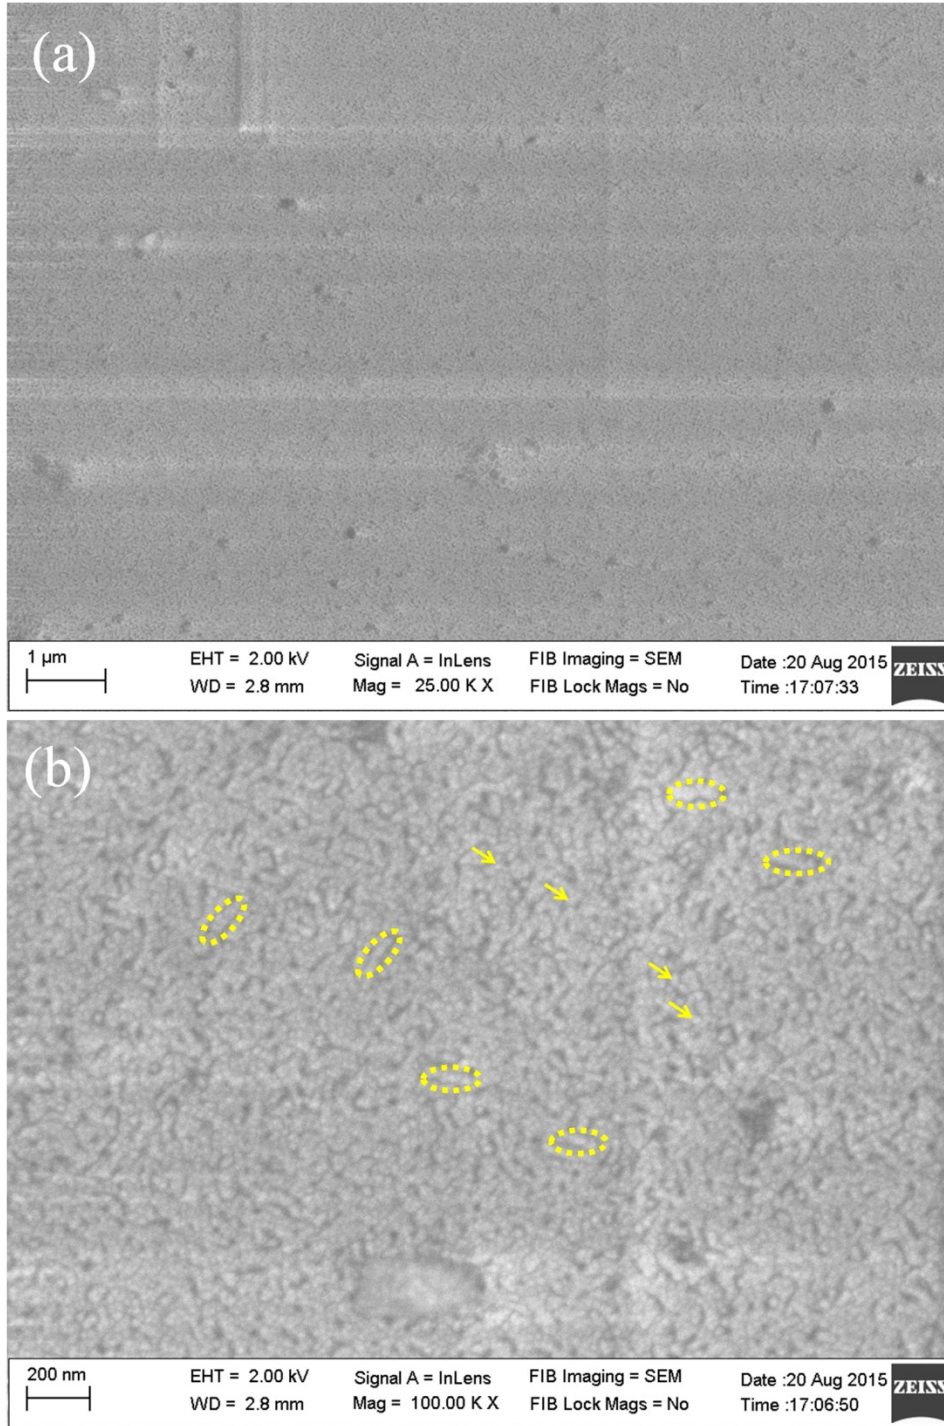

**Fig. S3.** (a) Typical FESEM image showing morphology of MQWs containing the nanometer sized platelets uniformly distributed all over the surface ( $\sim 10 \times 10 \mu\text{m}$ ). (b) The high magnification image for the surface protrusions in the order of 10s (arrow head) to 100s (encircled portions) of nm. The integral multiples of nanometer sized protrusions also can act as a micron sized platelets ( $\sim 2 \mu\text{m}$ ).

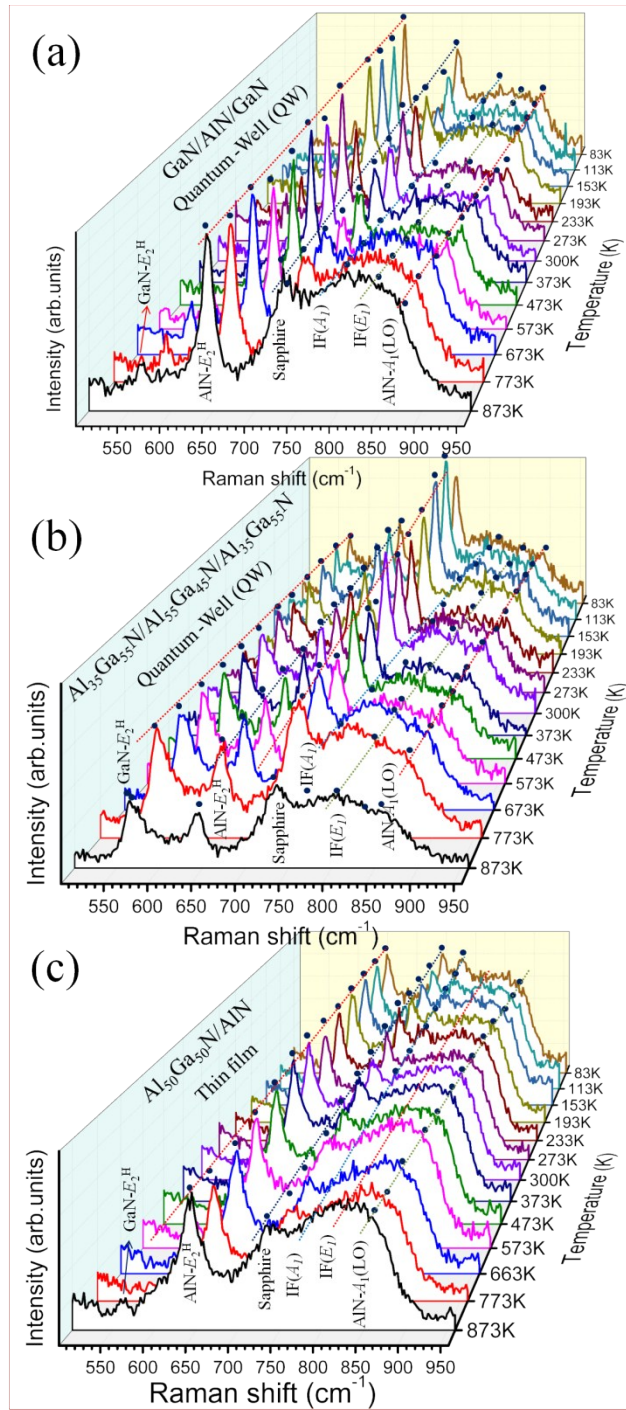

**Fig. S4** The temperature dependent evolution of IF phonon modes along with allowed Raman modes of (a) [GaN/AlN]<sub>20</sub> MQWs (b) [Al<sub>0.35</sub>Ga<sub>0.65</sub>N/Al<sub>0.55</sub>Ga<sub>0.45</sub>N]<sub>20</sub> MQWs and (c) Al<sub>0.50</sub>Ga<sub>0.50</sub>N/AlN thin film.

#### References

- [1] D. Korakakis, K. F. Ludwig, Jr. and T. D. Moustakas, X-ray characterization of GaN/AlGaN multiple quantum wells for ultraviolet laser diodes, *Appl. Phys. Lett.* **1998**, *72*, 1004-1006.
